# Supplementary material for: Ratiometric fluorescent paper sensor utilizing hybrid carbon dots–quantum dots for the visual determination of copper ions
Source: Royal Society of Chemistry journal article supplement (doi:10.1039/c6nr00430j), 2016-01-01
Supplement: c6nr00430j1.pdf [file c6nr00430j1.pdf]

## Electronic Supplementary Information

### Ratiometric fluorescent paper sensor utilizing hybrid carbon dots-quantum dots for the visual determination of copper ions

Yahui Wang,<sup>†abc</sup> Cheng Zhang,<sup>†abc</sup> Xiaochun Chen,<sup>ab</sup> Bo Yang,<sup>abc</sup> Liang Yang,<sup>abc</sup> Changlong Jiang<sup>\*abc</sup> and Zhongping Zhang<sup>\*abc</sup>

<sup>a</sup> CAS Center for Excellence in Nanoscience, Institute of Intelligent Machines,  
Chinese Academy of Sciences, Hefei, Anhui 230031, China.

<sup>b</sup> Department of Chemistry, University of Science and Technology of China,  
Hefei, Anhui 230026, China.

<sup>c</sup> State Key Laboratory of Transducer Technology Chinese Academy of Sciences,  
Hefei, Anhui, 230031, China.

\*Corresponding author E-mail: cljiang@iim.ac.cn, zpzhang@iim.ac.cn

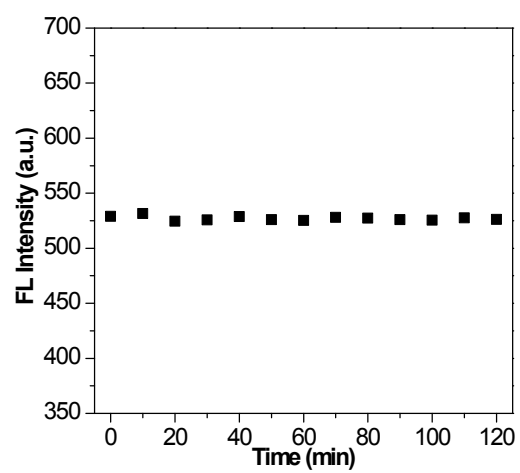

**Figure S1.** Stability of the fluorescence intensity of CDs in 2 h.

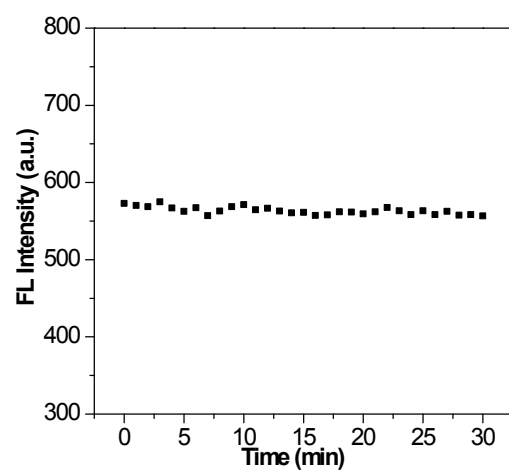

**Figure S2.** Time course of CDs in the presence of 200 nM Cu<sup>2+</sup> in 30 min.

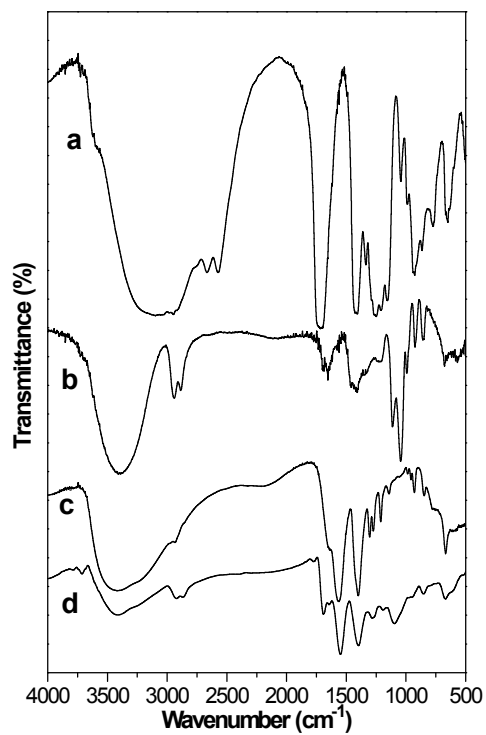

**Figure S3.** The FT-IR spectra of (a) 3-mercaptopropionic acid (MPA), (b) MPA capped CdTe QDs, (c) amine-coated CDs and (d) ratiometric fluorescence probe.

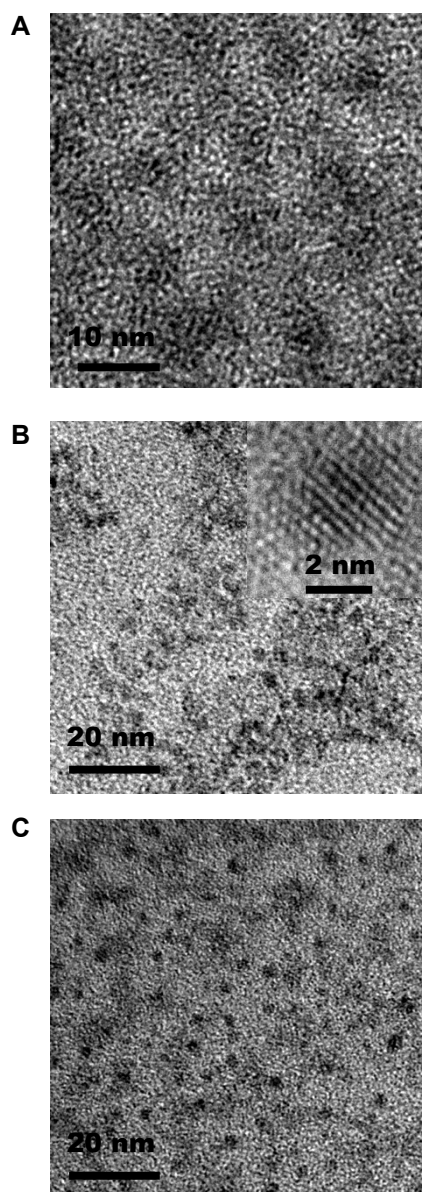

**Figure S4.** TEM images of (A) the blue CDs, (B) the red QDs (inset: the corresponding HR-TEM image) and (C) the ratiometric fluorescence probe.

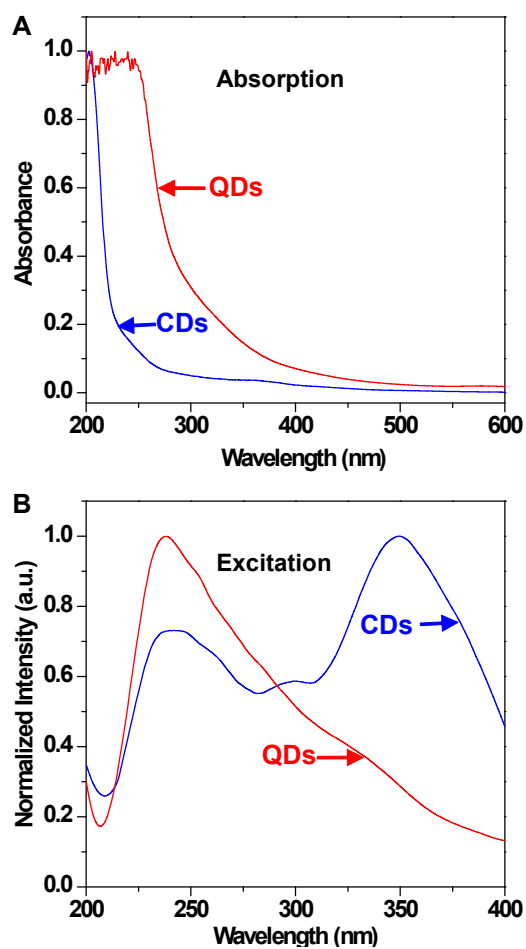

**Figure S5.** (A) The absorption spectra of blue-emission CDs and red-emission MPA–CdTe QDs. (B) The fluorescence excitation spectra of blue-emission CDs ( $E_m=440$  nm) and red-emission MPA–CdTe QDs ( $E_m=654$  nm).

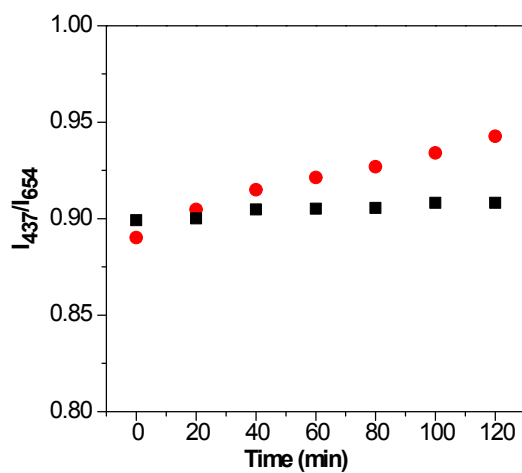

**Figure S6.** Stability of the fluorescence intensity ratio ( $I_{437}/I_{654}$ ) of the nanohybrid probe (black square) and the simple mixed of QDs and CDs (red circles), respectively.

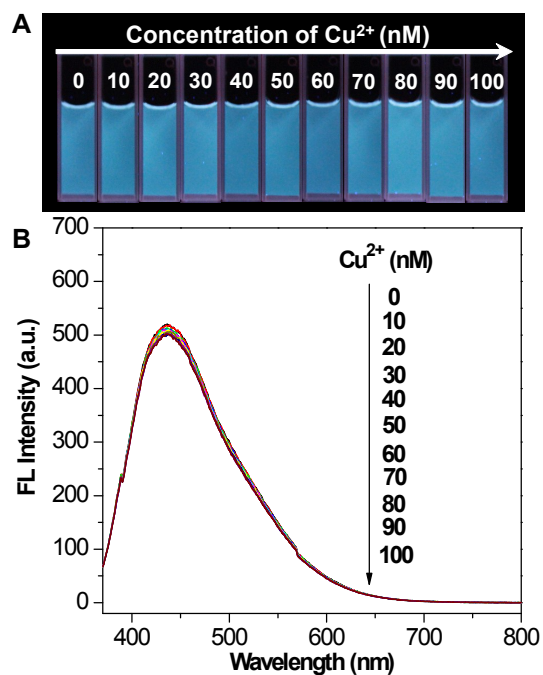

**Figure S7.** (A) The fluorescence image set and (B) the corresponding fluorescence spectra ( $\lambda_{\text{ex}}=340$  nm) of the blue CDs upon the addition of different concentrations of  $\text{Cu}^{2+}$ .

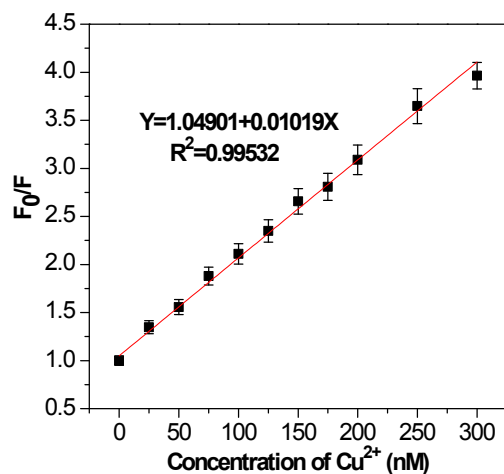

**Figure S8.** Plot of the fluorescence intensity change ( $F_0/F$ ) of the red MPA-CdTe QDs as a function of the concentrations of  $\text{Cu}^{2+}$  ( $\lambda_{\text{ex}}=340$  nm).

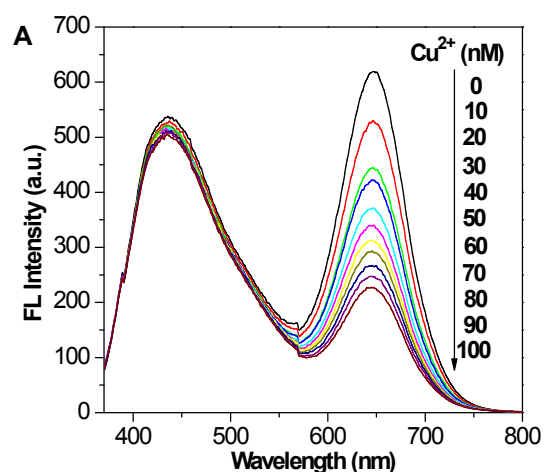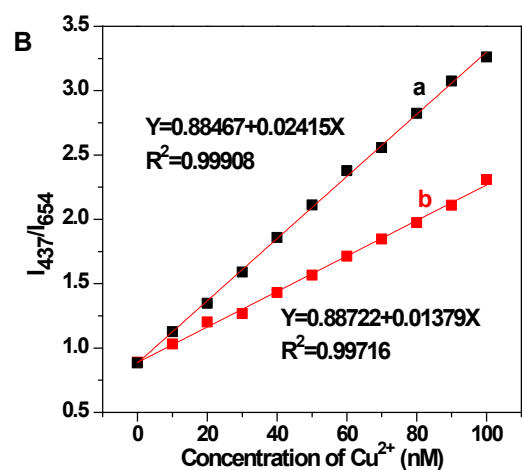

**Figure S9.** (A) The fluorescence spectra of the simple mixed of MPA-CdTe QDs and CDs upon the addition of different concentrations of Cu<sup>2+</sup>. (B) Changes in the fluorescence intensity ratio ( $I_{437}/I_{654}$ ) of (a) the ratiometric probe and (b) the mixture of CDs and MPA-CdTe QDs exposure to different concentrations of Cu<sup>2+</sup>.

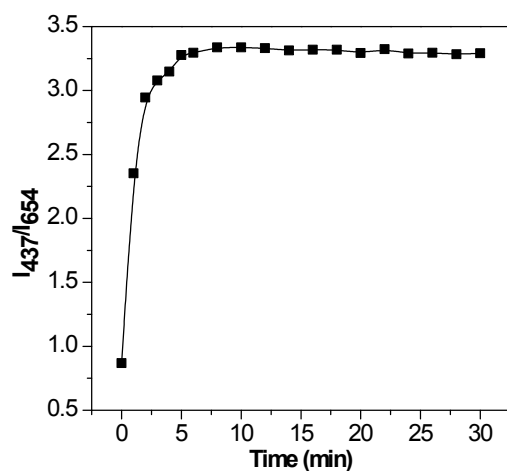

**Figure S10.** The kinetics of fluorescence quenching. The fluorescence quenching ratio ( $I_{437}/I_{654}$ ) of the ratiometric fluorescence probe via time with the addition of 100 nM Cu<sup>2+</sup>.

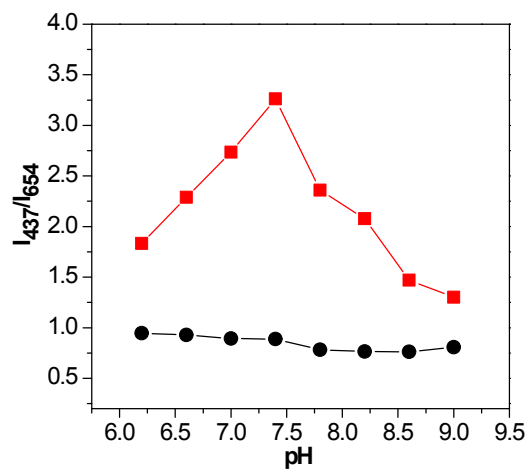

**Figure S11.** Effect of pH on the fluorescence intensity ratio ( $I_{437}/I_{654}$ ) of the ratiometric probe in the absence (black line) and presence (red line) of 100 nM  $\text{Cu}^{2+}$ .

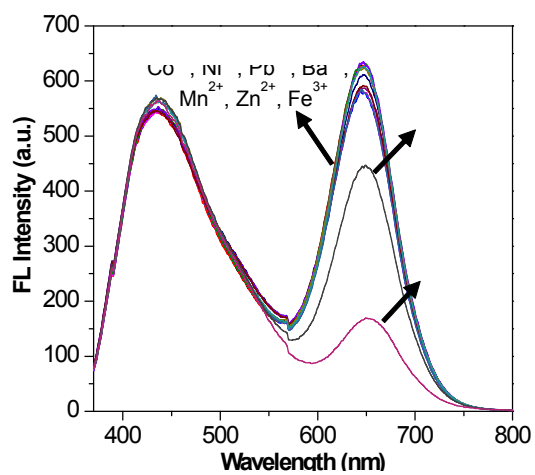

**Figure S12.** Fluorescence responses of the ratiometric probe towards various metal ions in the HEPES buffer (10 mM, pH=7.4). The concentrations of metal ions are 100 nM.



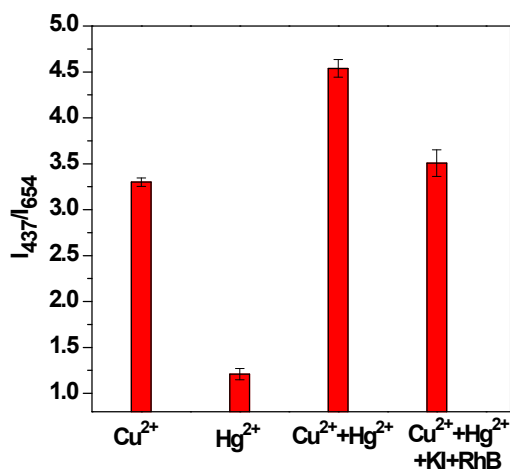

**Figure S13.** Fluorescence responses of the ratiometric probe towards 100 nM of  $\text{Cu}^{2+}$ ,  $\text{Hg}^{2+}$ , the mixture of  $\text{Cu}^{2+}$  and  $\text{Hg}^{2+}$ , the pretreated mixture of  $\text{Cu}^{2+}$  and  $\text{Hg}^{2+}$ .

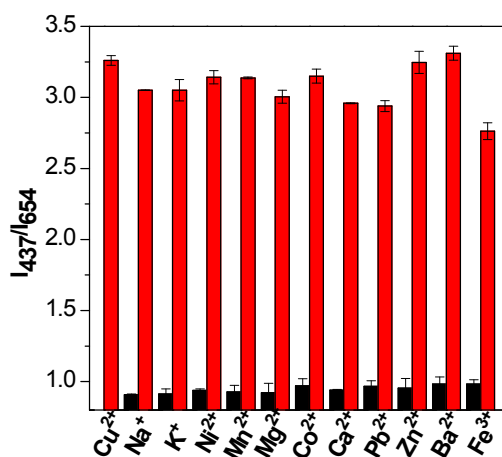

**Figure S14.** The interference studies of the nanohybrid probe toward  $\text{Cu}^{2+}$ . Fluorescence responses of the ratiometric probe towards various metal ions in HEPES buffer(10 mM, pH=7.4). The black bars represent the addition of an excess of cations (1  $\mu\text{M}$ ) in the absence of copper ions. The red bars represent the subsequent addition of 100 nM  $\text{Cu}^{2+}$  to the above solution.

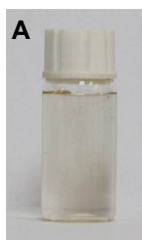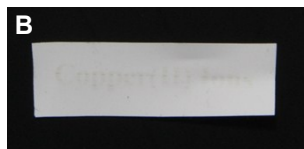

**Figure S15.** Images of (A) the prepared nanohybrid dispersed in water and (B) the paper-based test strip under daylight.

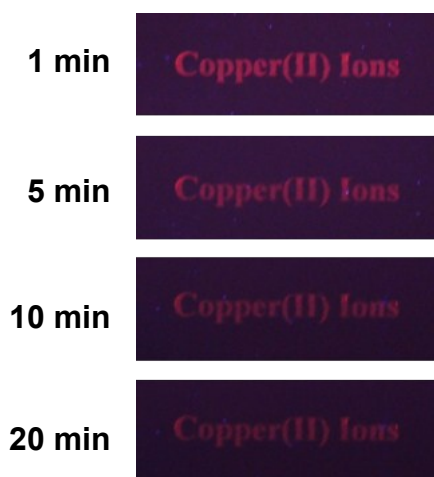

**Figure S16.** Stability of the fluorescence of the printed pattern “Copper(II)” immersed in water within 20 minutes.
